# Supplementary material
Source: PubMed Central journal article supplement (PMC9645400)
Supplement: NIHMS1845700-supplement-SI_file.pdf [file NIHMS1845700-supplement-SI_file.pdf]

Supporting Information

Biodegradable Crosslinked Nanocapsules by Miniemulsion  
Crosslinking of Zwitterionic Sulfobetaine Polymer for Cancer  
Imaging

*Haotian Sun,<sup>†</sup> Lingyue Yan,<sup>‡</sup> Kevin A. Carter,<sup>‡</sup> Jiaqi Zhang,<sup>†</sup> Julia Caserto,<sup>†</sup> Jonathan F. Lovell,<sup>‡</sup> Yun Wu,<sup>\*,‡</sup> and Chong Cheng<sup>\*,†</sup>*

<sup>†</sup>Department of Chemical and Biological Engineering, University at Buffalo, The State University of New York, Buffalo, New York, 14260, USA.

<sup>‡</sup>Department of Biomedical Engineering, University at Buffalo, The State University of New York, Buffalo, New York, 14260, USA.

\* Authors to whom correspondence should be addressed:

E-mail addresses: ccheng8@buffalo.edu (C. Cheng); ywu32@buffalo.edu (Y. Wu)

## Supporting Figures

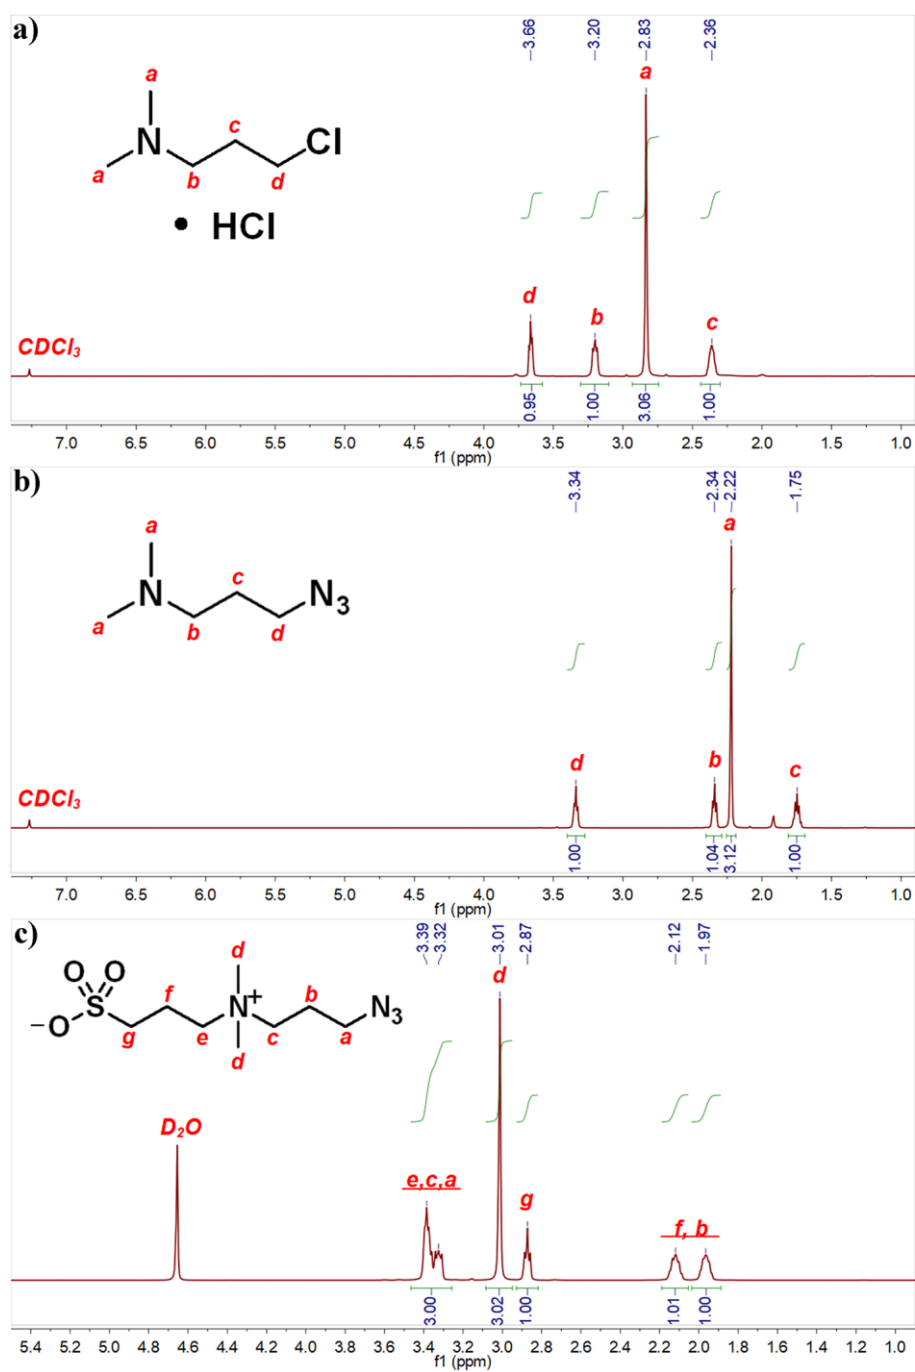

**Figure S1.** <sup>1</sup>H NMR spectra of a) 3-dimethylamino-1-propyl chloride hydrochloride in CDCl<sub>3</sub>, b) 3-azido-*N,N*-dimethylpropan-1-amine in CDCl<sub>3</sub>, and c) SB-N<sub>3</sub> (**1**) in D<sub>2</sub>O.

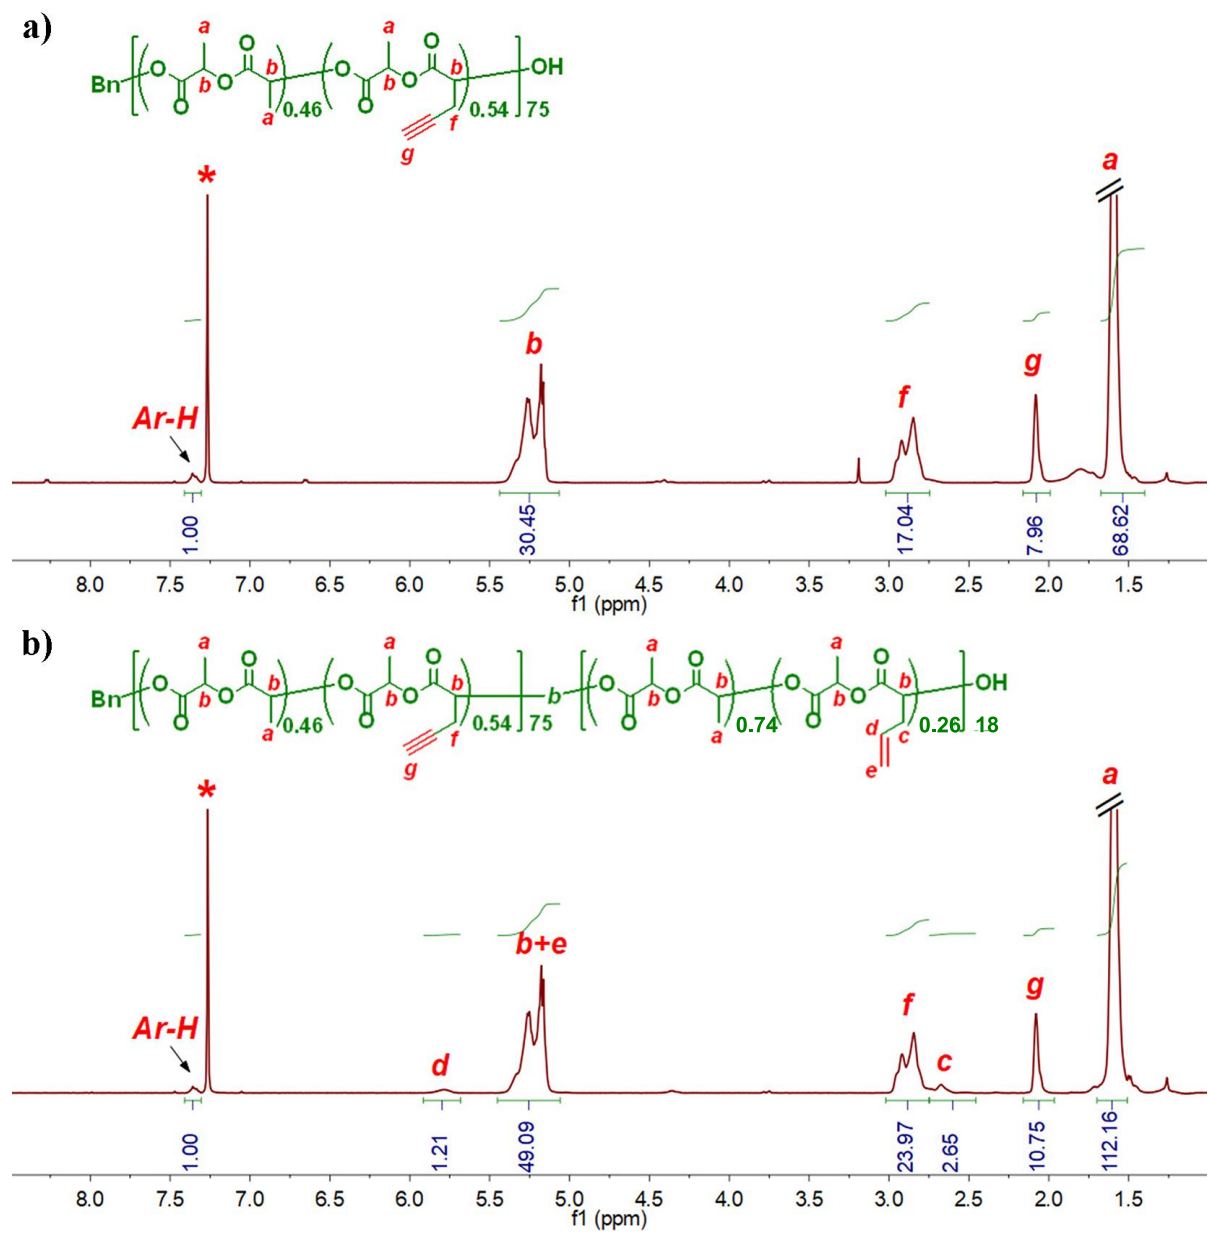

**Figure S2.**  $^1\text{H}$  NMR spectra of a) **2**, b) **3** in  $\text{CDCl}_3$ .

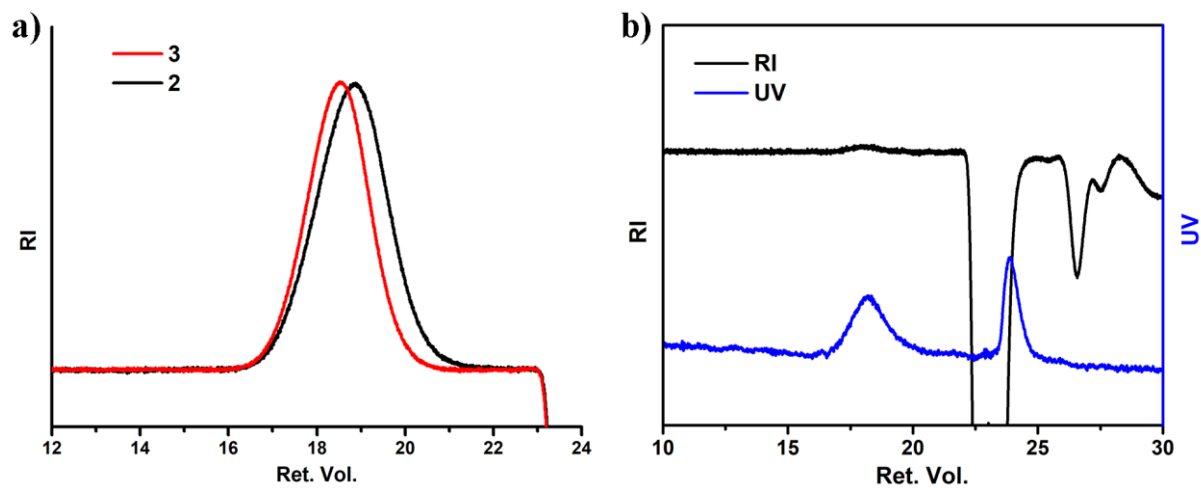

**Figure S3.** GPC curves of a) **2** and **3**, b) crude product of **4**.

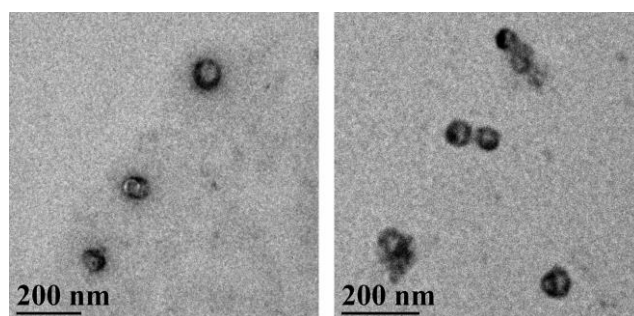

**Figure S4.** TEM images of NCs **5**.

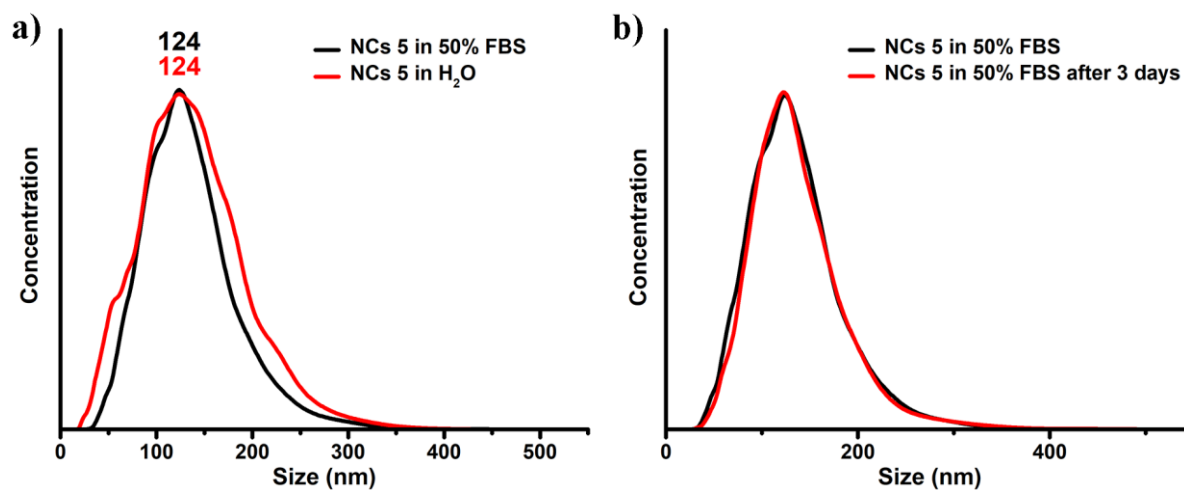

**Figure S5.** NanoSight curves of a) NCs **5** in H<sub>2</sub>O and 50% FBS, respectively, b) NCs **5** in 50% FBS before and after 3 days at 37°C.

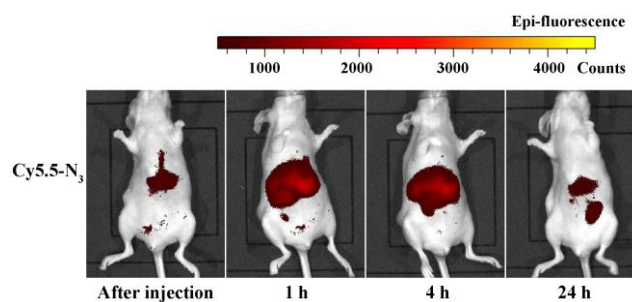

**Figure S6.** *In vivo* fluorescence imaging of mice (ventral side) at different time points post injection of free Cy5.5-N<sub>3</sub>.
